# Supplementary material for: Eribulin Efficacy on Brain Metastases in Heavily Pretreated Patients with Metastatic Breast Cancer
Source: MDPI journal article supplement (doi:10.3390/jcm10061272), 2021-03-18
Supplement: s1 [file s1]

## Supplementary Materials

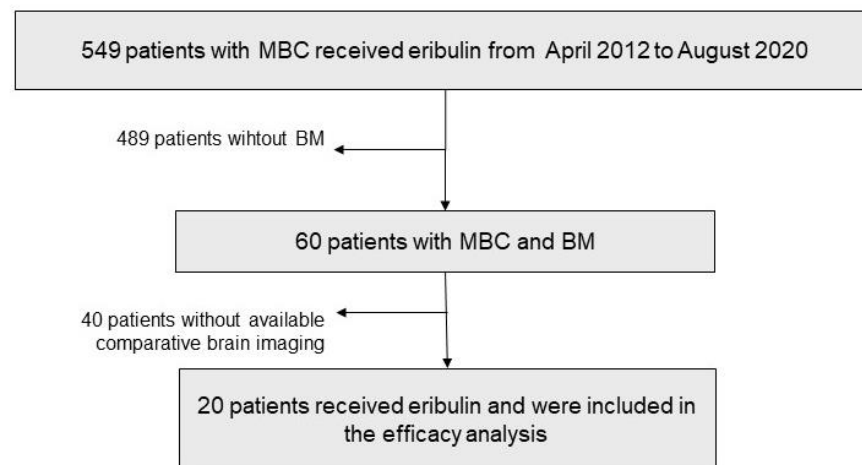

**Figure S1.** Flowchart diagram.

**Table S1.** STROBE Statement—checklist of items that should be included in reports of observational studies.

|                      | Item No | Recommendation                                                                                                                                                                                          | Paragraph numbers in section*         |
|----------------------|---------|---------------------------------------------------------------------------------------------------------------------------------------------------------------------------------------------------------|---------------------------------------|
|                      |         |                                                                                                                                                                                                         |                                       |
| Title and abstract   | 1       | (a) Indicate the study’s design with a commonly used term in the title or the abstract                                                                                                                  | Abstract Section 2                    |
|                      |         | (b) Provide in the abstract an informative and balanced summary of what was done and what was found                                                                                                     | Abstract Section 2–3                  |
| Introduction         |         |                                                                                                                                                                                                         |                                       |
| Background/rationale | 2       | Explain the scientific background and rationale for the investigation being reported                                                                                                                    | 1–2–3                                 |
| Objectives           | 3       | State specific objectives, including any prespecified hypotheses                                                                                                                                        | 4                                     |
| Methods              |         |                                                                                                                                                                                                         |                                       |
| Study design         | 4       | Present key elements of study design early in the paper                                                                                                                                                 | Demographics and endpoints paragraphs |
| Setting              | 5       | Describe the setting, locations, and relevant dates, including periods of recruitment, exposure, follow-up, and data collection                                                                         | Demographics paragraph                |
| Participants         | 6       | Cohort study—Give the eligibility criteria, and the sources and methods of selection of participants. Describe methods of follow-up.                                                                    | Demographics paragraph                |
|                      |         | Case-control study—Give the eligibility criteria, and the sources and methods of case ascertainment and control selection. Give the rationale for the choice of cases and controls.                     |                                       |
|                      |         | Cross-sectional study—Give the eligibility criteria, and the sources and methods of selection of participants                                                                                           |                                       |
|                      |         | (b) Cohort study—For matched studies, give matching criteria and number of exposed and unexposed.<br>Case-control study—For matched studies, give matching criteria and the number of controls per case |                                       |

|                           |     |                                                                                                                                                                                                                |                                                            |
|---------------------------|-----|----------------------------------------------------------------------------------------------------------------------------------------------------------------------------------------------------------------|------------------------------------------------------------|
| Variables                 | 7   | Clearly define all outcomes, exposures, predictors, potential confounders, and effect modifiers. Give diagnostic criteria, if applicable                                                                       | Endpoint paragraph                                         |
| Data sources/ measurement | 8*  | For each variable of interest, give sources of data and details of methods of assessment (measurement). Describe comparability of assessment methods if there is more than one group                           | Endpoints paragraph                                        |
| Bias                      | 9   | Describe any efforts to address potential sources of bias                                                                                                                                                      |                                                            |
| Study size                | 10  | Explain how the study size was arrived at                                                                                                                                                                      | NA for this retrospective study                            |
| Quantitative variables    | 11  | Explain how quantitative variables were handled in the analyses. If applicable, describe which groupings were chosen and why                                                                                   | Statistical analysis paragraph                             |
|                           |     | (a) Describe all statistical methods, including those used to control for confounding                                                                                                                          | Statistical analysis paragraph                             |
|                           |     | (b) Describe any methods used to examine subgroups and interactions                                                                                                                                            | Statistical analysis paragraph                             |
|                           |     | (c) Explain how missing data were addressed                                                                                                                                                                    | ND                                                         |
| Statistical methods       | 12  | (d) Cohort study—If applicable, explain how loss to follow-up was addressed                                                                                                                                    |                                                            |
|                           |     | Case-control study—If applicable, explain how matching of cases and controls was addressed                                                                                                                     | Statistical analysis paragraph                             |
|                           |     | Cross-sectional study—If applicable, describe analytical methods taking account of sampling strategy                                                                                                           |                                                            |
|                           |     | (e) Describe any sensitivity analyses                                                                                                                                                                          |                                                            |
| <b>Results</b>            |     |                                                                                                                                                                                                                |                                                            |
| Participants              | 13* | (a) Report numbers of individuals at each stage of study—e.g. numbers potentially eligible, examined for eligibility, confirmed eligible, included in the study, completing follow-up, and analyzed            | Supplementary figure 1 (CONSORT diagram)                   |
|                           |     | (b) Give reasons for non-participation at each stage                                                                                                                                                           | Supplementary figure 1 (CONSORT diagram)                   |
|                           |     | (c) Consider use of a flow diagram                                                                                                                                                                             | Supplementary figure 1 (CONSORT diagram)                   |
| Descriptive data          | 14* | (a) Give characteristics of study participants (e.g. demographic, clinical, social) and information on exposures and potential confounders                                                                     | Demographics paragraph and Table 1                         |
|                           |     | (b) Indicate number of participants with missing data for each variable of interest                                                                                                                            | Table 1                                                    |
|                           |     | (c) Cohort study—Summaries follow-up time (e.g., average and total amount)                                                                                                                                     | Eribulin efficacy on BCBM paragraph                        |
| Outcome data              | 15* | Cohort study—Report numbers of outcome events or summary measures over time                                                                                                                                    | Eribulin efficacy on BCBM paragraph                        |
|                           |     | Case-control study—Report numbers in each exposure category, or summary measures of exposure                                                                                                                   | NA                                                         |
|                           |     | Cross-sectional study—Report numbers of outcome events or summary measures                                                                                                                                     | NA                                                         |
| Main results              | 16  | (a) Give unadjusted estimates and, if applicable, confounder-adjusted estimates and their precision (e.g., 95% confidence interval). Make clear which confounders were adjusted for and why they were included | Eribulin efficacy on BCBM paragraph, Figure 1, and table 2 |
|                           |     | (b) Report category boundaries when continuous variables were categorized                                                                                                                                      | Eribulin efficacy on BCBM paragraph and table 2            |
|                           |     | (c) If relevant, consider translating estimates of relative risk into absolute risk for a meaningful time period                                                                                               | NA                                                         |

|                          |    |                                                                                                                                                                            |                                                                  |
|--------------------------|----|----------------------------------------------------------------------------------------------------------------------------------------------------------------------------|------------------------------------------------------------------|
| Other analyses           | 17 | Report other analyses done—e.g. analyses of subgroups and interactions, and sensitivity analyses                                                                           | Other survival endpoints paragraph, Figures 2 and 3, and table 3 |
| <b>Discussion</b>        |    |                                                                                                                                                                            |                                                                  |
| Key results              | 18 | Summaries key results with reference to study objectives                                                                                                                   | 1st paragraph                                                    |
| Limitations              | 19 | Discuss limitations of the study, taking into account sources of potential bias or imprecision. Discuss both direction and magnitude of any potential bias                 | 5th paragraph                                                    |
| Interpretation           | 20 | Give a cautious overall interpretation of results considering objectives, limitations, multiplicity of analyses, results from similar studies, and other relevant evidence | Paragraphs 2 to 4 and conclusion                                 |
| Generalizability         | 21 | Discuss the generalizability (external validity) of the study results                                                                                                      | Conclusion section                                               |
| <b>Other information</b> |    |                                                                                                                                                                            |                                                                  |
| Funding                  | 22 | Give the source of funding and the role of the funders for the present study and, if applicable, for the original study on which the present article is based              | Done                                                             |

\*Give information separately for cases and controls in case-control studies and, if applicable, for exposed and unexposed groups in cohort and cross-sectional studies.

**Note:** An Explanation and Elaboration article discusses each checklist item and gives methodological background and published examples of transparent reporting. The STROBE checklist is best used in conjunction with this article (freely available on the Web sites of PLoS Medicine at <http://www.plosmedicine.org/> (accessed on 12 March 2021), Annals of Internal Medicine at <http://www.annals.org/> (accessed on 12 March 2021), and Epidemiology at <http://www.epidem.com/> (accessed on 12 March 2021)). Information on the STROBE Initiative is available at [www.strobe-statement.org](http://www.strobe-statement.org) (accessed on 12 March 2021).
